# Supplementary material for: PCMDB: a curated and comprehensive resource of plant cell markers
Source: PubMed Central journal article supplement — Nucleic Acids Res. 2021 Oct 28;50(D1):D1448–55. doi: 10.1093/nar/gkab949 (PMC8728192; doi:10.1093/nar/gkab949), 2021-10-28

**Supplementary Table 1 Comparison between PCMDB and PlantscRNadb on number of marker genes, literature, and cell types.**

|                              | Experimentally Validated |       | Identified by Bulk RNA-seq |        | Identified by scRNA-seq |        | Overlap between PCMDB and PlantscRNadb |
|------------------------------|--------------------------|-------|----------------------------|--------|-------------------------|--------|----------------------------------------|
|                              | PlantscRNadb             | PCMDB | PlantscRNadb               | PCMDB  | PlantscRNadb            | PCMDB  |                                        |
| <b>Number of Maker Genes</b> |                          |       |                            |        |                         |        |                                        |
| <b>Arabidopsis</b>           | 353                      | 1,718 | 249                        | 4,004  | 14,717                  | 17,022 | 12,750                                 |
| <b>Rice</b>                  | 72                       | 623   | 26                         | 3,690  | 5,362                   | 17,003 | 5,306                                  |
| <b>Maize</b>                 | 84                       | 442   | 0                          | 11,516 | 5,817                   | 7,015  | NA(No GeneID)                          |
| <b>Soybean</b>               | NA                       | 79    | NA                         | 12,314 | NA                      | 0      | NA(No GeneID)                          |
| <b>Tomato</b>                | 40                       | 169   | 34                         | 8,056  | 0                       | 5,875  | NA                                     |
| <b>Tobacco</b>               | NA                       | 88    | NA                         | 1,045  | NA                      | 0      | NA                                     |
| <b>Number of Literatures</b> |                          |       |                            |        |                         |        |                                        |
| <b>Arabidopsis</b>           | 239                      | 790   | 1                          | 15     | 9                       | 14     | /                                      |
| <b>Rice</b>                  | 48                       | 340   | 1                          | 14     | 1                       | 3      | /                                      |
| <b>Maize</b>                 | 63                       | 208   | 0                          | 9      | 3                       | 3      | /                                      |
| <b>Soybean</b>               | NA                       | 71    | NA                         | 7      | NA                      | 0      | /                                      |
| <b>Tomato</b>                | 27                       | 149   | 2                          | 11     | 0                       | 1      | /                                      |
| <b>Tobacco</b>               | NA                       | 64    | NA                         | 2      | NA                      | 0      | /                                      |
| <b>Number of Cell Types</b>  |                          |       |                            |        |                         |        |                                        |
| <b>Arabidopsis</b>           | 121                      | 159   | 1                          | 54     | 40                      | 42     | /                                      |
| <b>Rice</b>                  | 39                       | 95    | 6                          | 25     | 8                       | 19     | /                                      |
| <b>Maize</b>                 | 25                       | 68    | 0                          | 25     | 24                      | 12     | /                                      |
| <b>Soybean</b>               | NA                       | 25    | NA                         | 14     | NA                      | 0      | /                                      |
| <b>Tomato</b>                | 25                       | 69    | 8                          | 27     | 0                       | 9      | /                                      |
| <b>Tobacco</b>               | NA                       | 22    | NA                         | 6      | NA                      | 0      | /                                      |

**Supplementary Table 2 The number of literatures for different source during process of literature.**

|                    | <b>Round 1</b>                            | <b>Round 2</b> | <b>Round 3</b> |
|--------------------|-------------------------------------------|----------------|----------------|
|                    | <b>Number of Experimental Literatures</b> |                |                |
| <b>Arabidopsis</b> | 31,967                                    | 2,883          | 790            |
| <b>Rice</b>        | 17,945                                    | 996            | 340            |
| <b>Maize</b>       | 16,552                                    | 649            | 208            |
| <b>Soybean</b>     | 11,593                                    | 336            | 71             |
| <b>Tomato</b>      | 10,150                                    | 277            | 149            |
| <b>Tobacco</b>     | 37,283                                    | 272            | 64             |
|                    | <b>Number of Bulk RNA-seq Literatures</b> |                |                |
| <b>Arabidopsis</b> | 11,011                                    | 47             | 15             |
| <b>Rice</b>        | 3,169                                     | 17             | 14             |
| <b>Maize</b>       | 1,593                                     | 34             | 9              |
| <b>Soybean</b>     | 1,821                                     | 22             | 7              |
| <b>Tomato</b>      | 609                                       | 22             | 11             |
| <b>Tobacco</b>     | 1,727                                     | 8              | 2              |
|                    | <b>Number of scRNA-seq Literatures</b>    |                |                |
| <b>Arabidopsis</b> | 28                                        | 14             | 14             |
| <b>Rice</b>        | 6                                         | 3              | 3              |
| <b>Maize</b>       | 3                                         | 3              | 3              |
| <b>Soybean</b>     | 3                                         | 0              | 0              |
| <b>Tomato</b>      | 2                                         | 1              | 1              |
| <b>Tobacco</b>     | 3                                         | 0              | 0              |

Supplementary Figure 1 The number of marker genes for the top 20 cell types identified by bulk RNA-seq in each plant species.

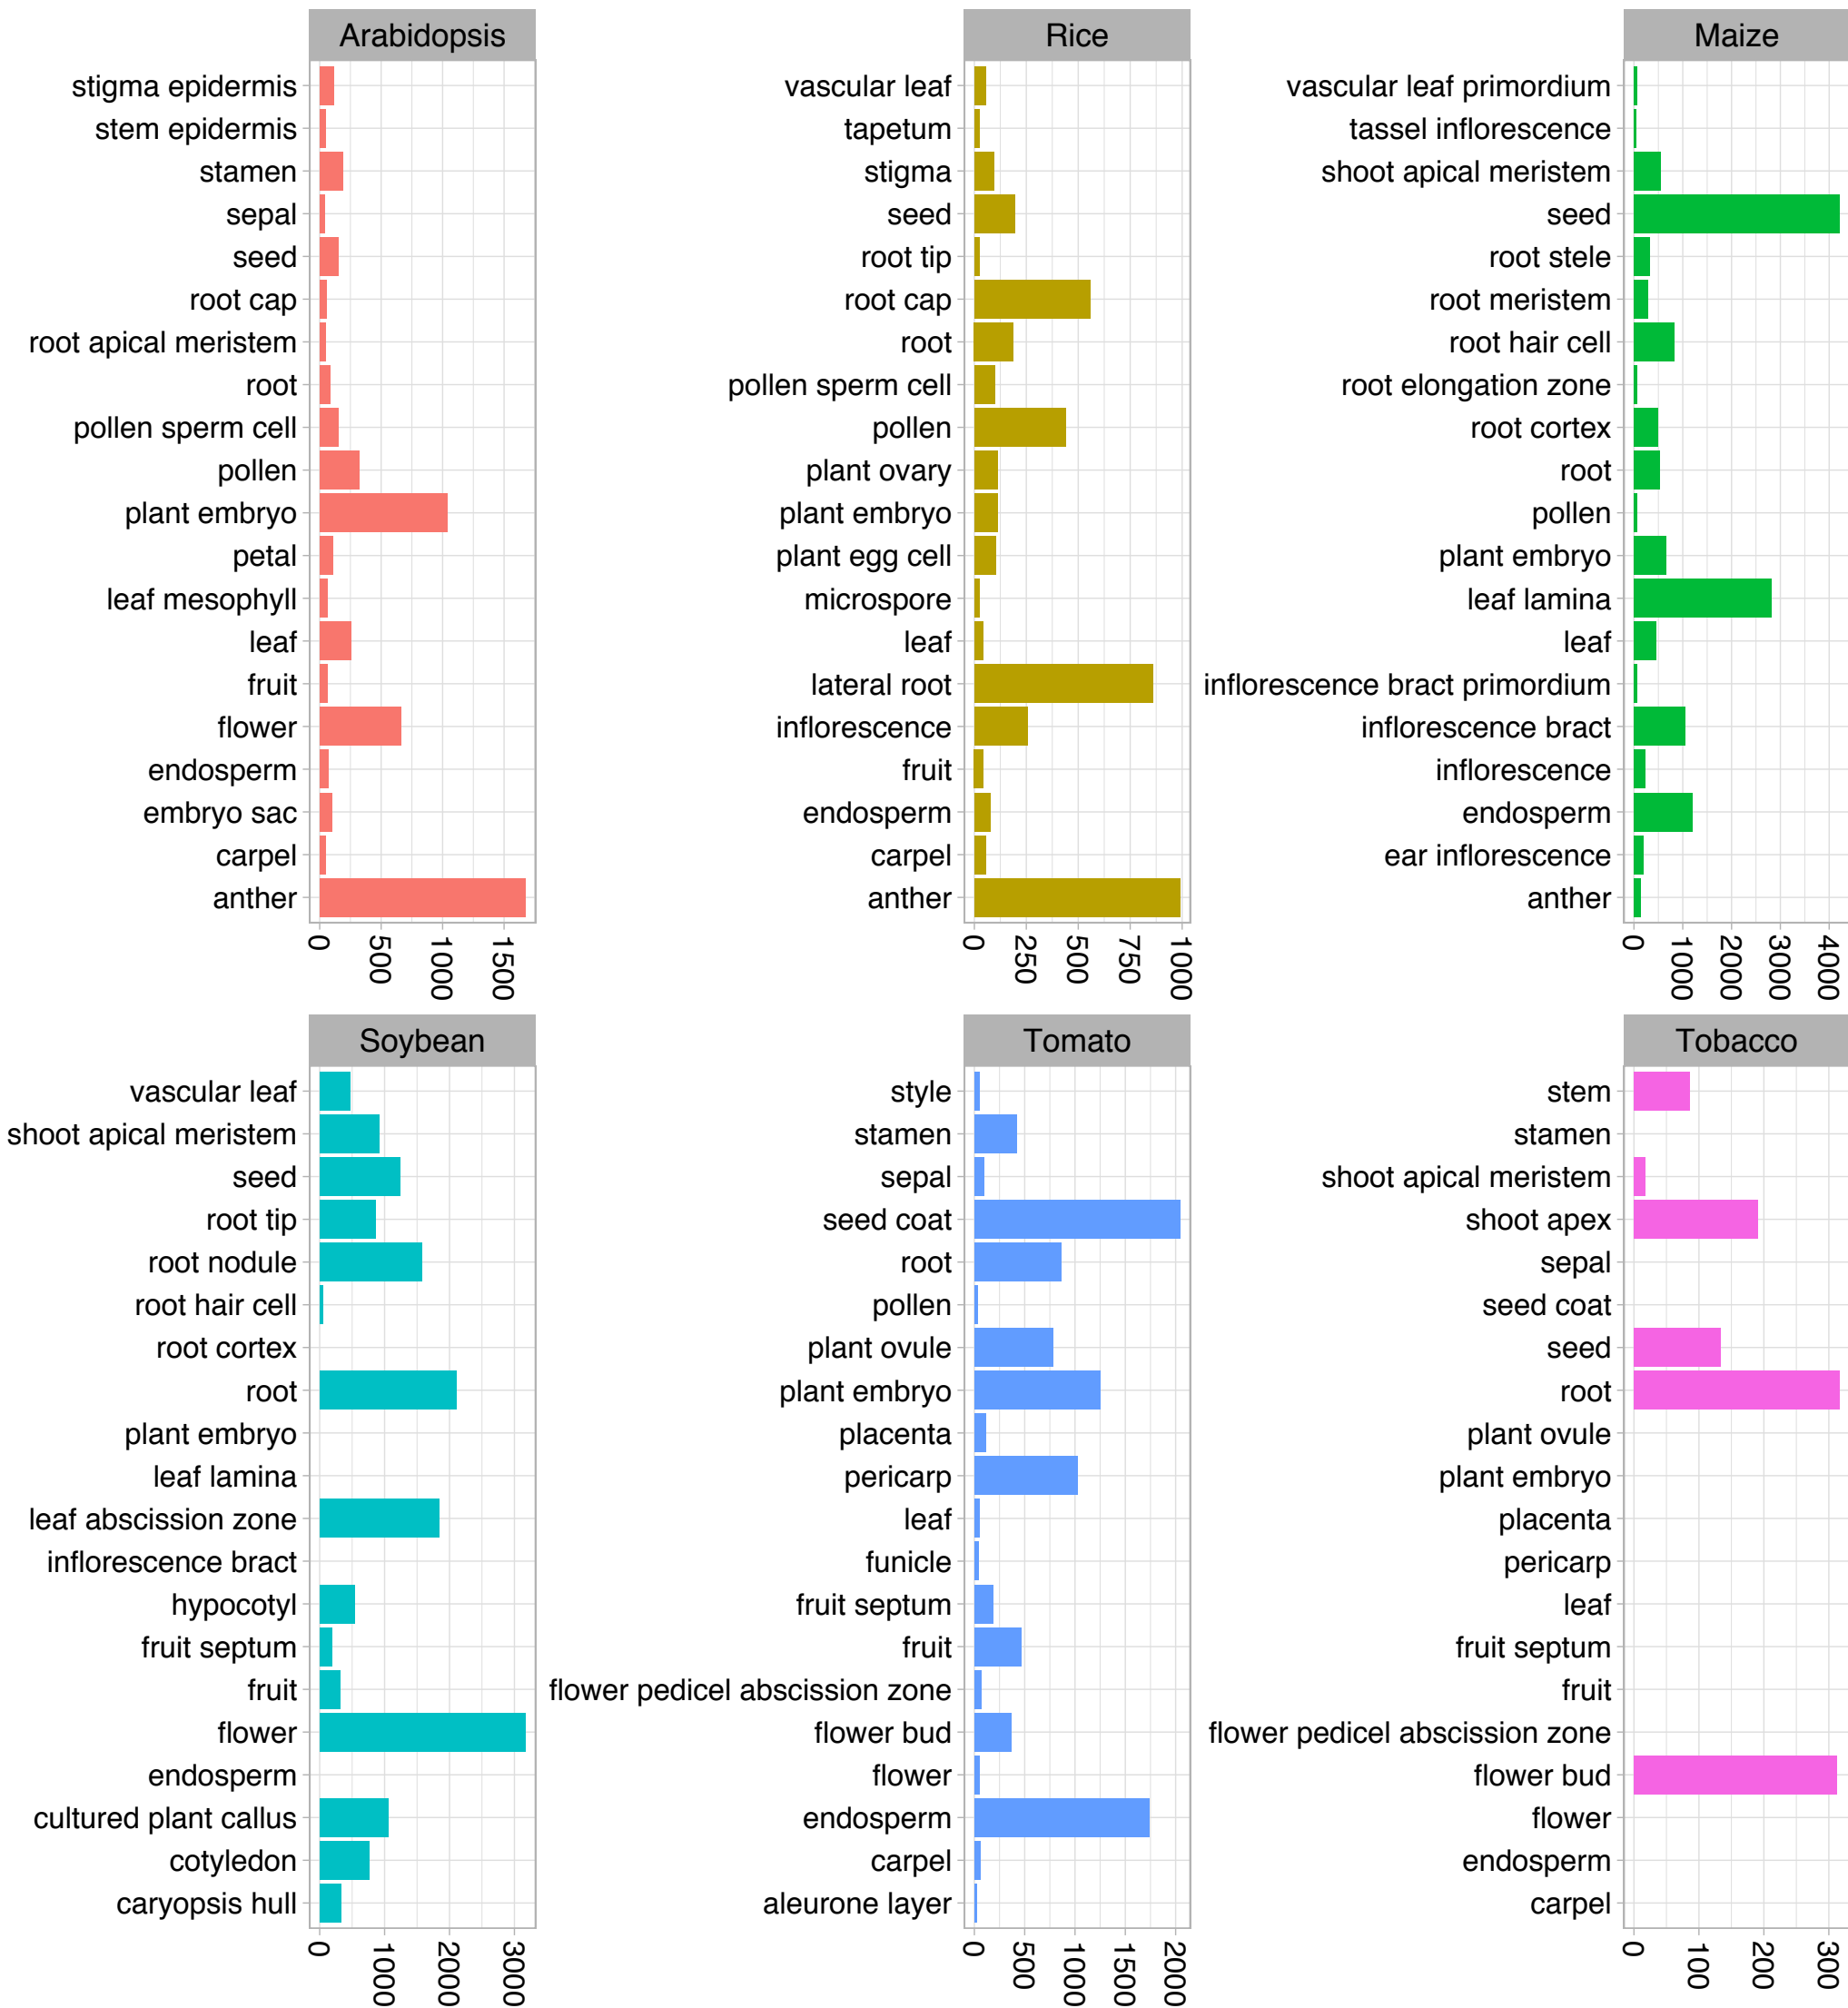

Supplementary Figure 2 The number of marker genes for the top 20 cell types identified by scRNA-seq in each plant species.

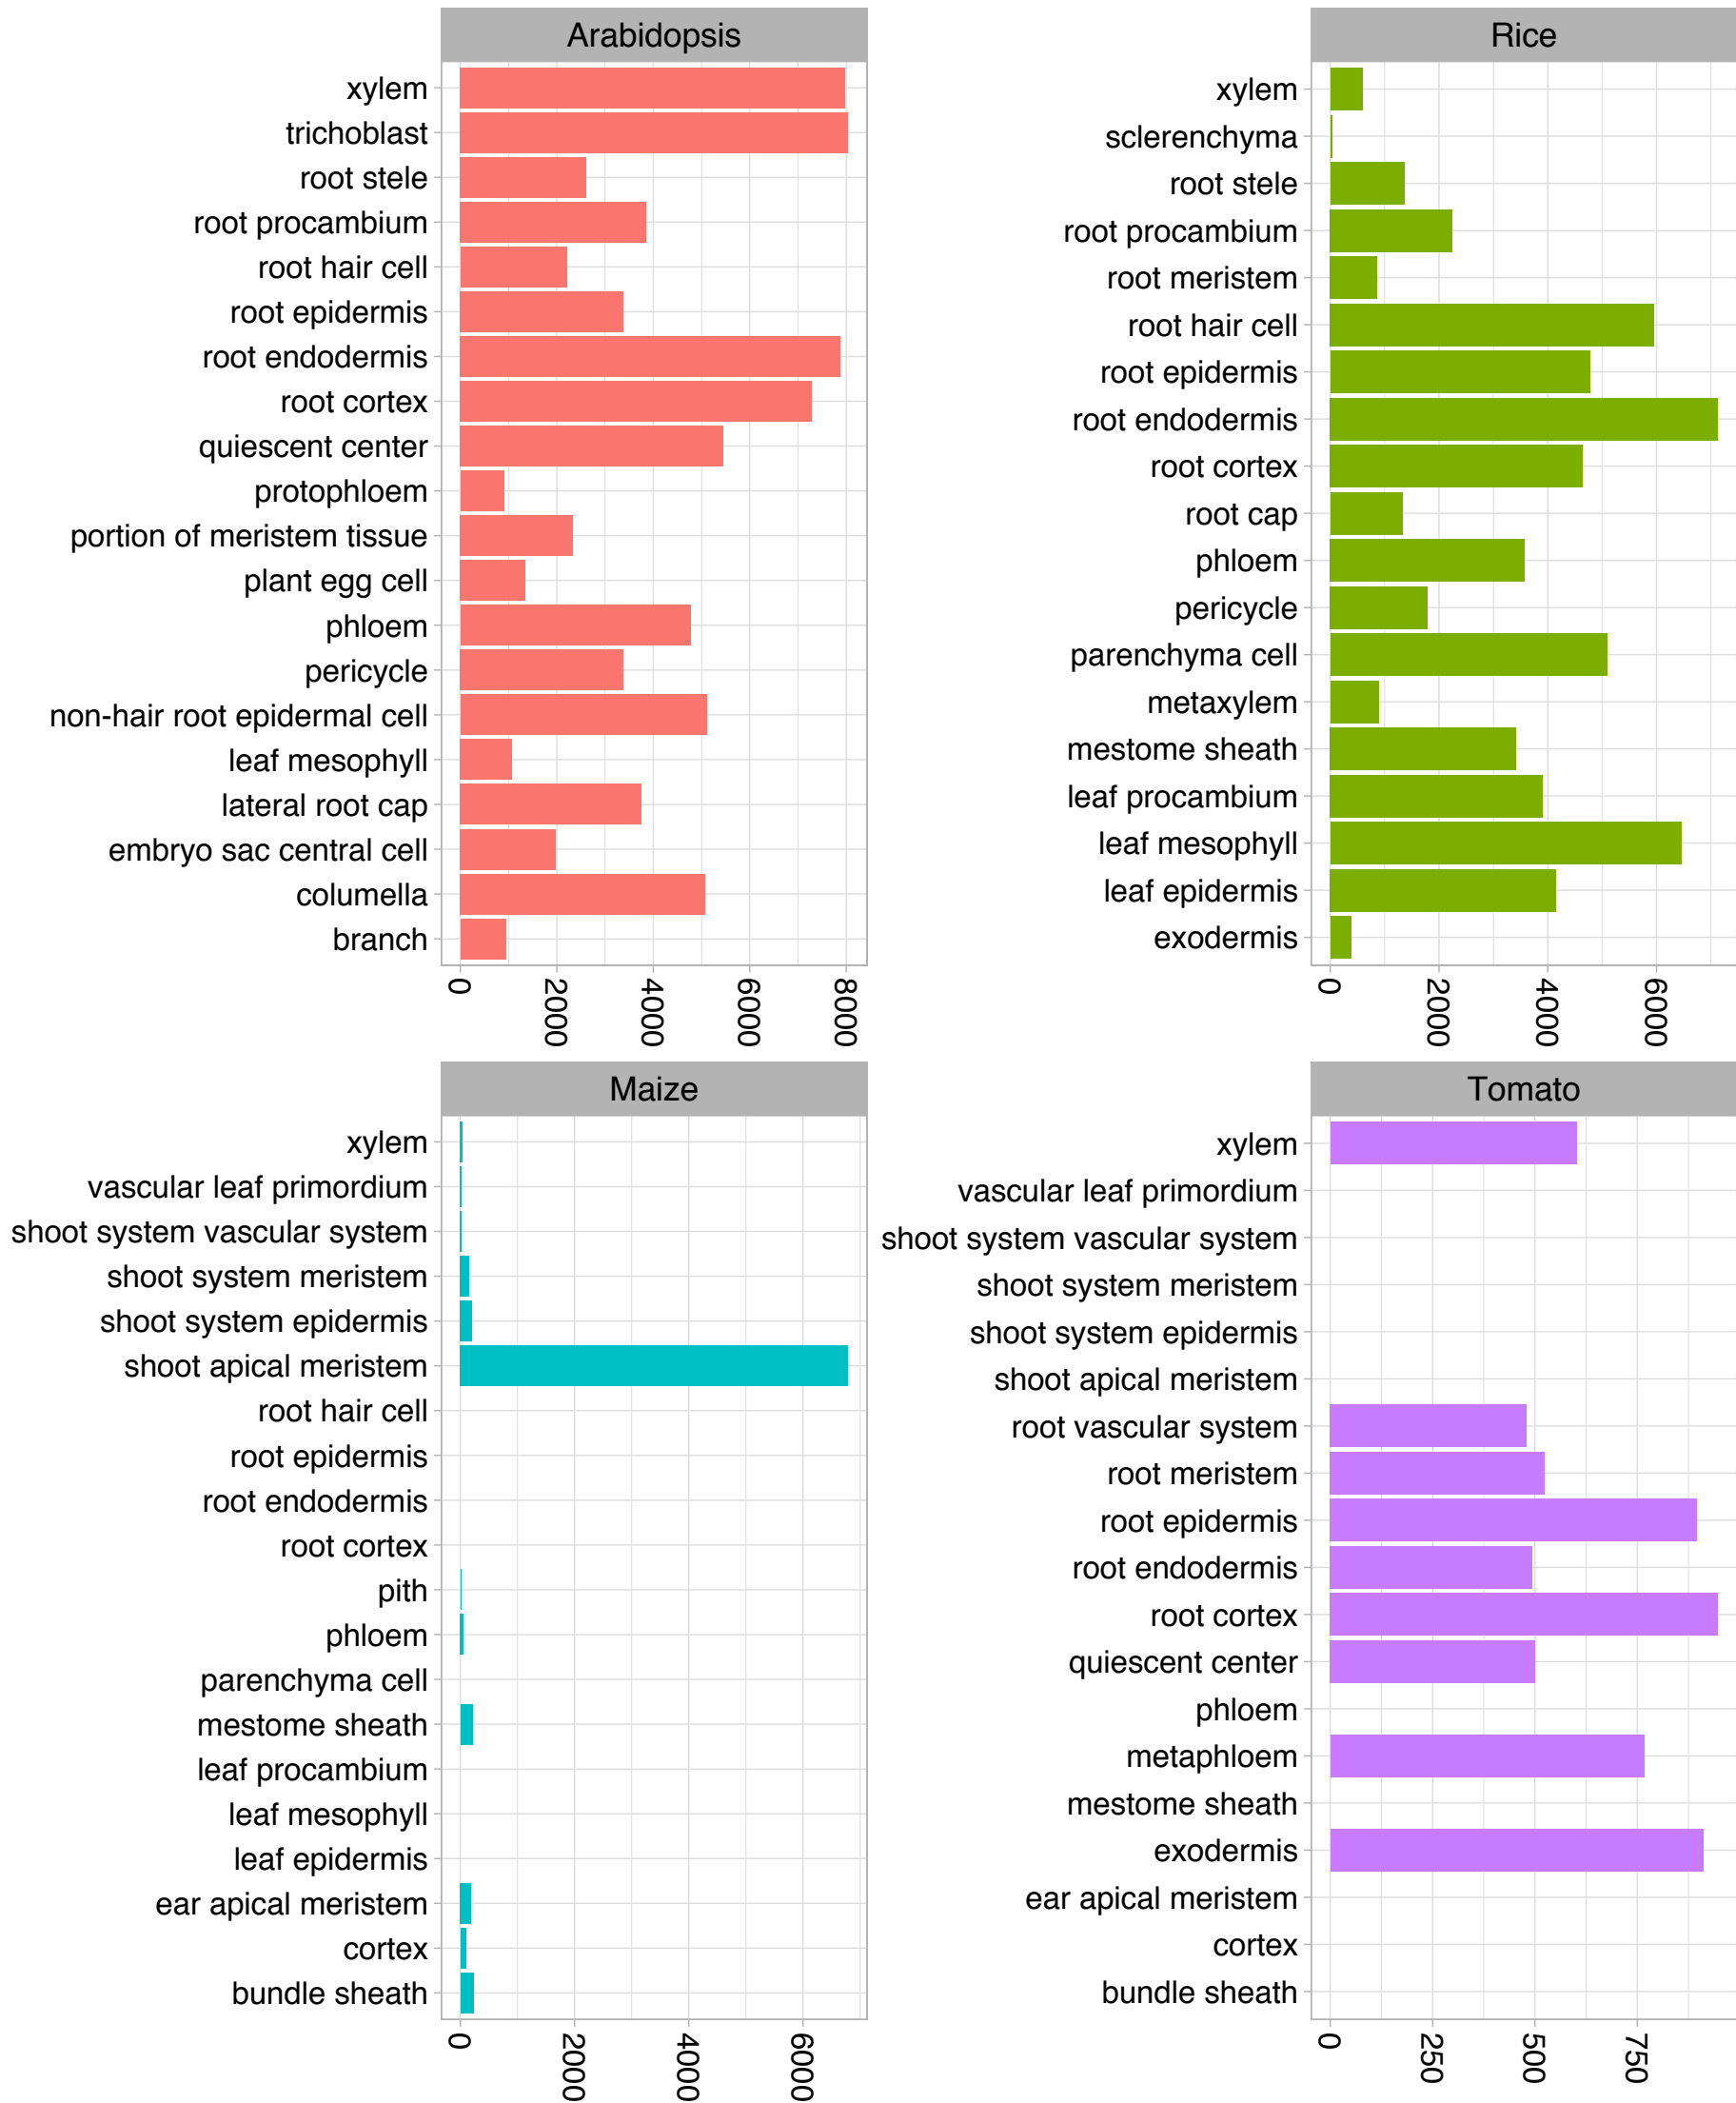

Supplementary Figure 3: The result of SCSA prediction for the scRNA-seq dataset of Zhang et al. (PMID:31004836) using marker genes from different sources.

Left Top: The number of marker genes for each cluster of the input data. Right Top: The number of clusters classified into different types (Good, Uncertain, and Unknown) by SCSA. Left Bottom: Z-score of cluster label for clusters classified into the Good type. Right Bottom: Z-score of top 2 cluster labels for clusters classified into the Uncertain type.

- (A) The result of SCSA prediction using 103 known marker genes mentioned in Zhang et al.
- (B) The result of SCSA prediction using 923 experimental related root marker genes in PCMDB.
- (C) The result of SCSA prediction using 162 bulk RNA-seq related root marker genes in PCMDB.
- (D) The result of SCSA prediction using 11,654 scRNA-seq related root marker genes in PCMDB.
- (E) The result of SCSA prediction using all root marker genes in PCMDB.

Supplementary Figure 3A. The result of SCSA prediction using 103 known marker genes mentioned in Zhang et al.

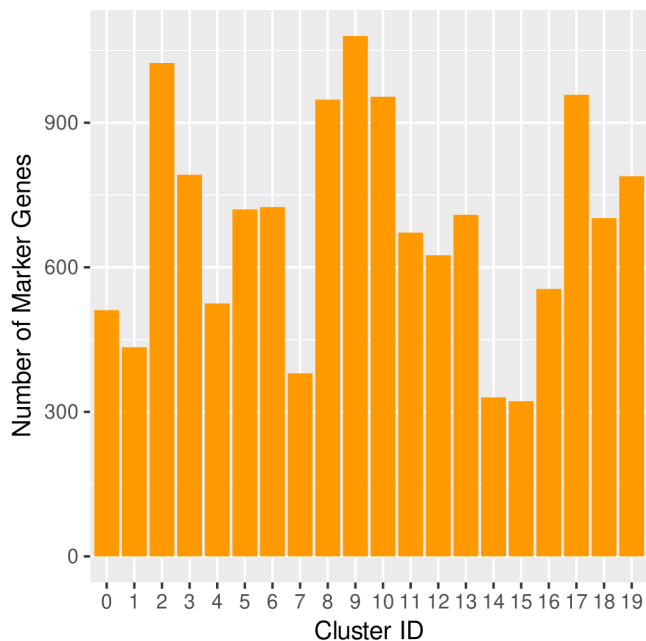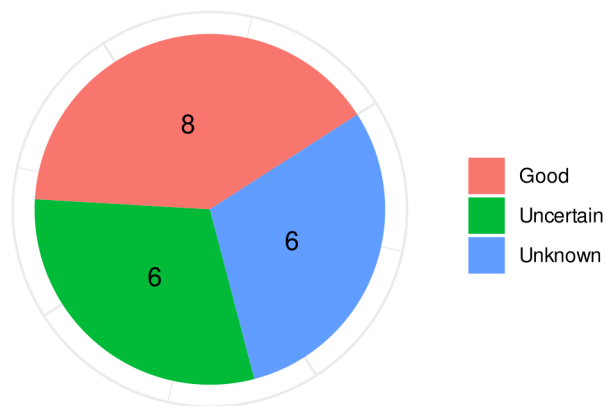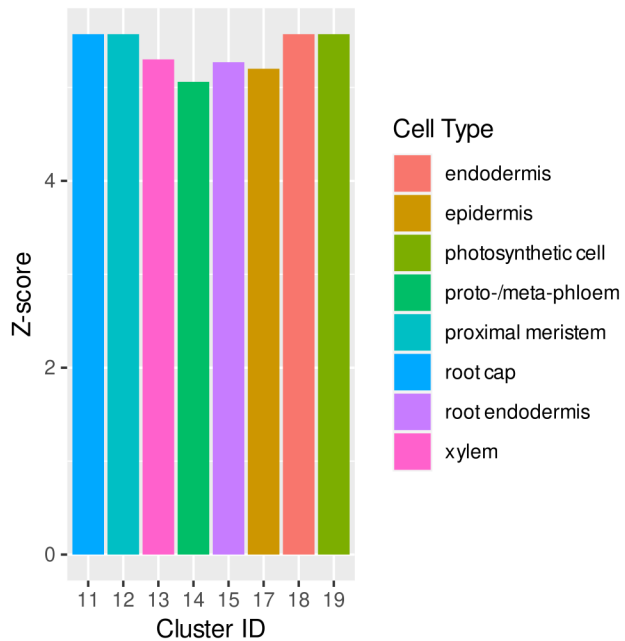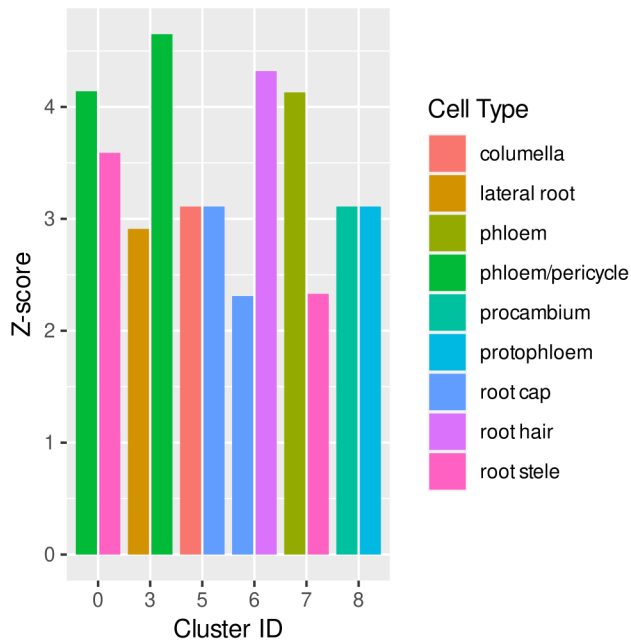

Supplementary Figure 3B. The result of SCSA prediction using 923 experimental related root marker genes in PCMDB.

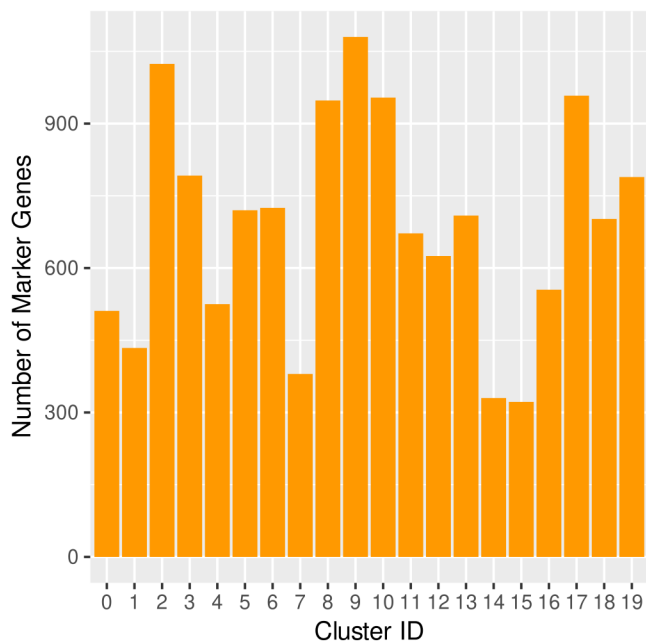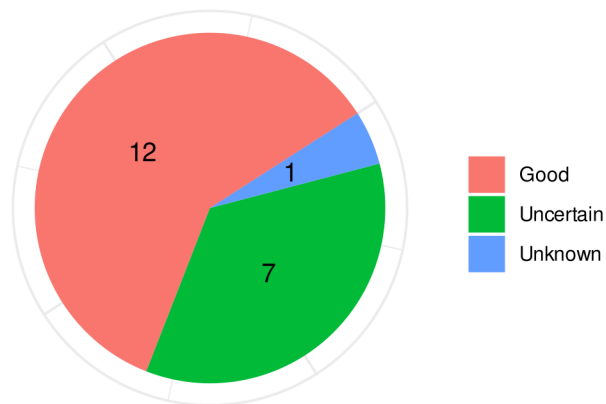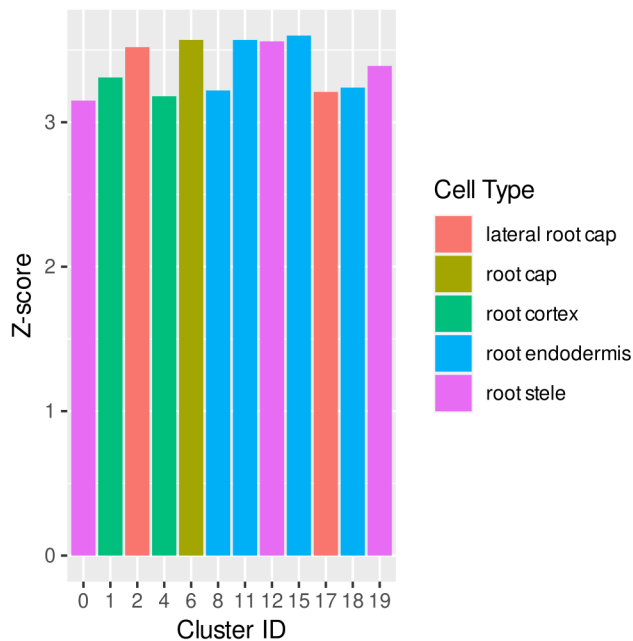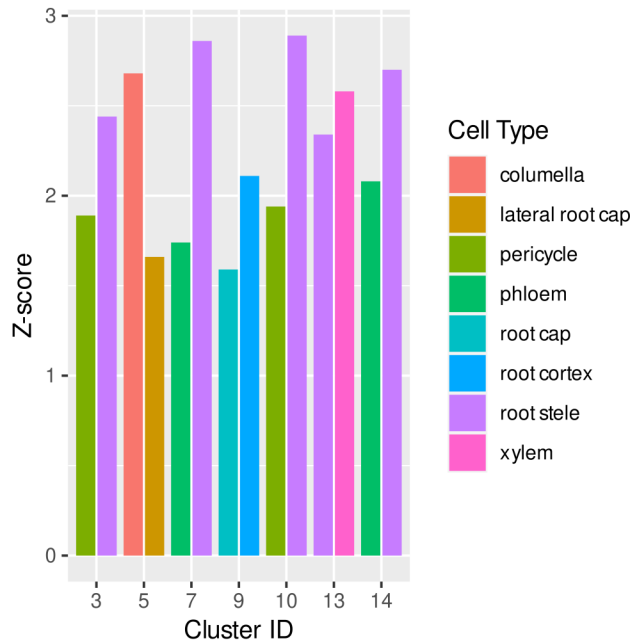

# Supplementary Figure 3C. The result of SCSA prediction using 162 bulk RNA-seq related root marker genes in PCMDB

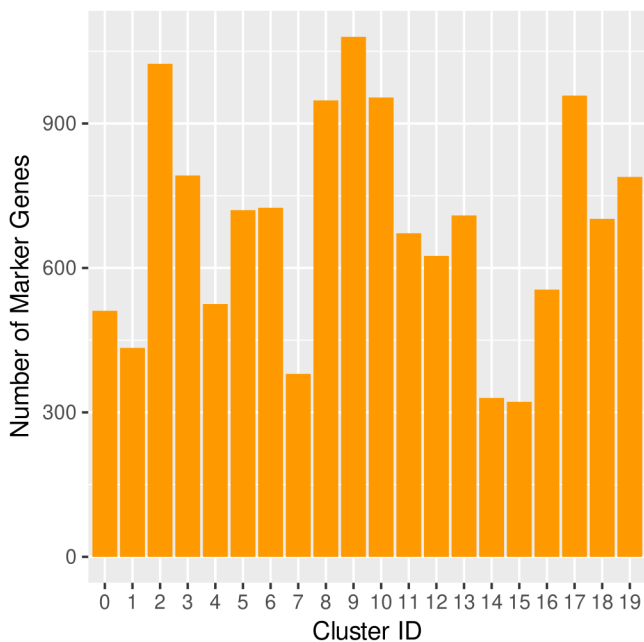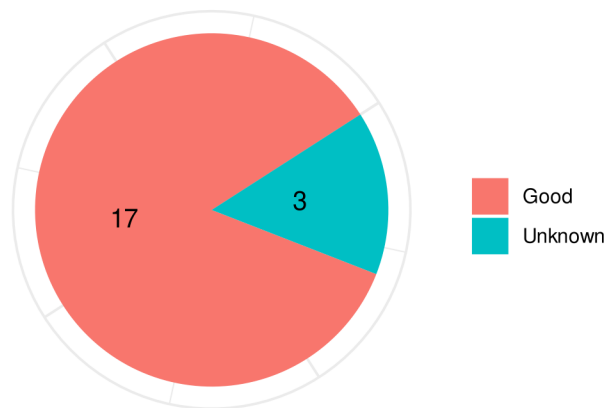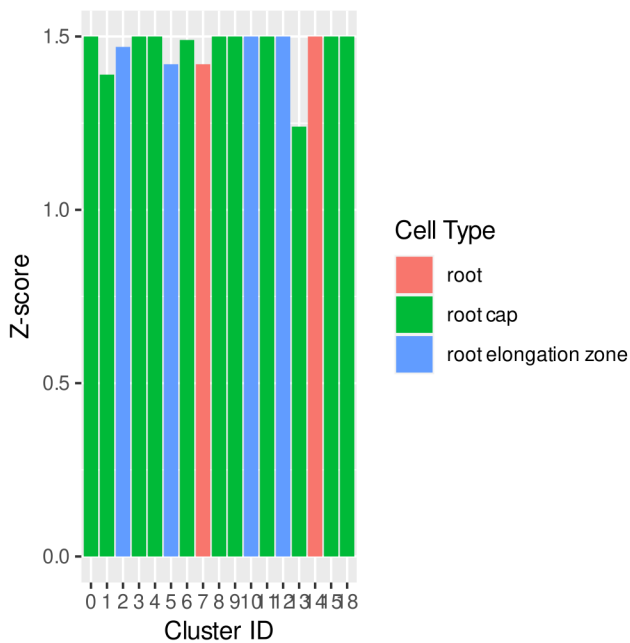



Supplementary Figure 3D. The result of SCSA prediction using 11,654 scRNA-seq related root marker genes in PCMDB

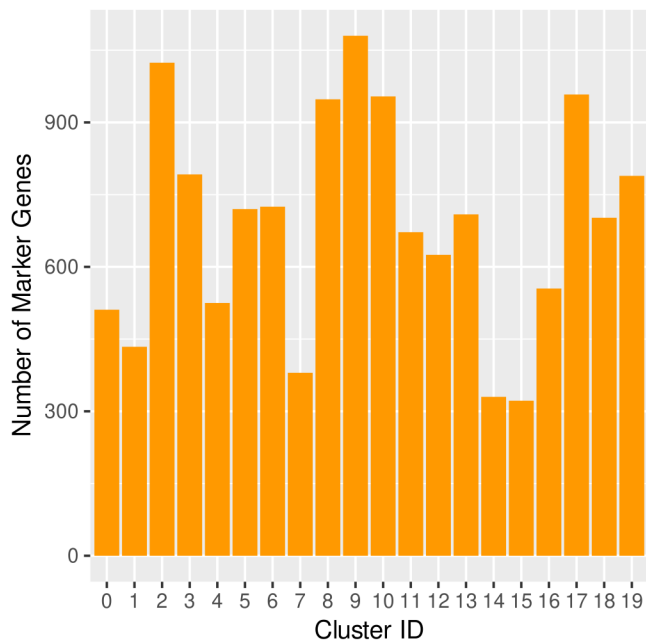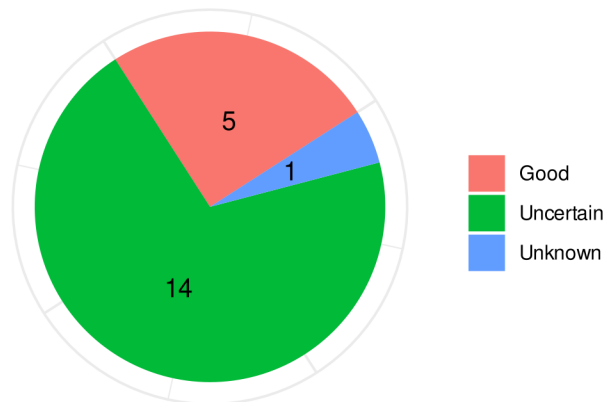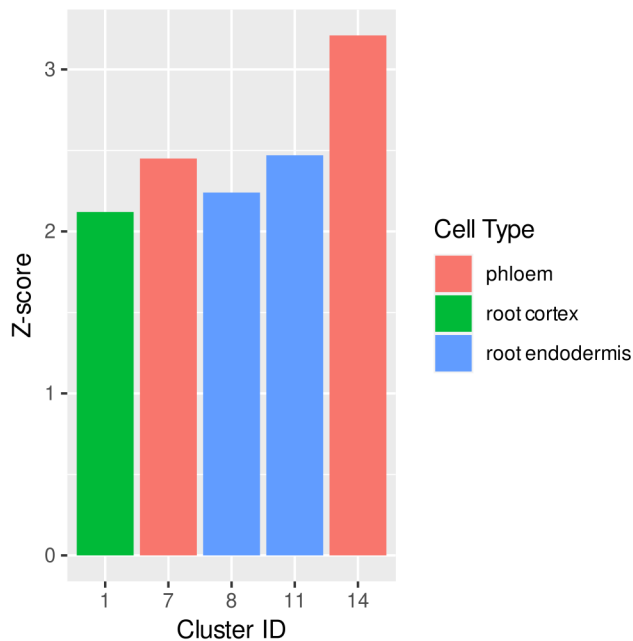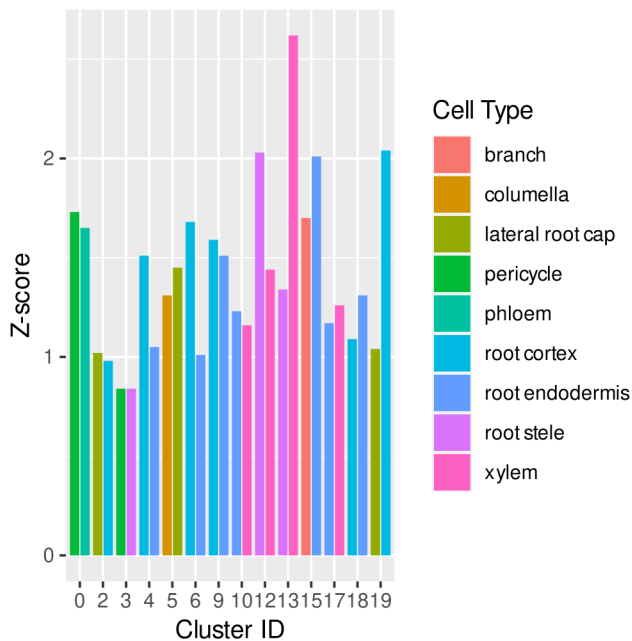

Supplementary Figure 3E. The result of SCSA prediction using all root marker genes in PCMDB.

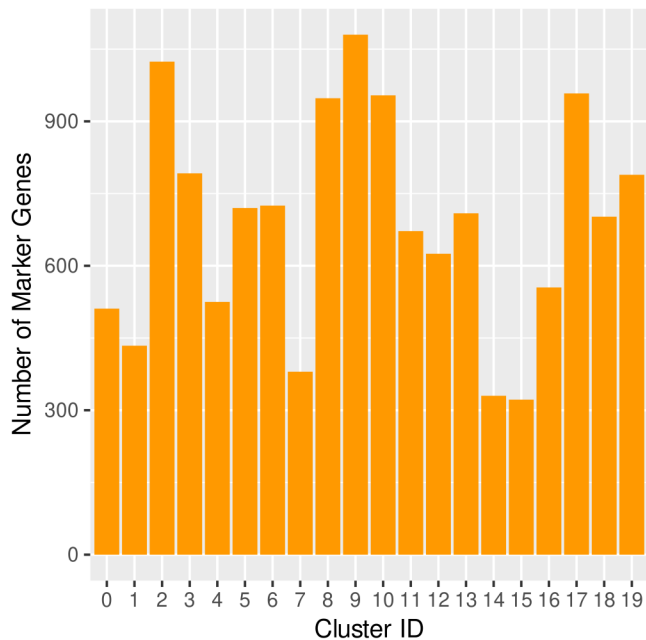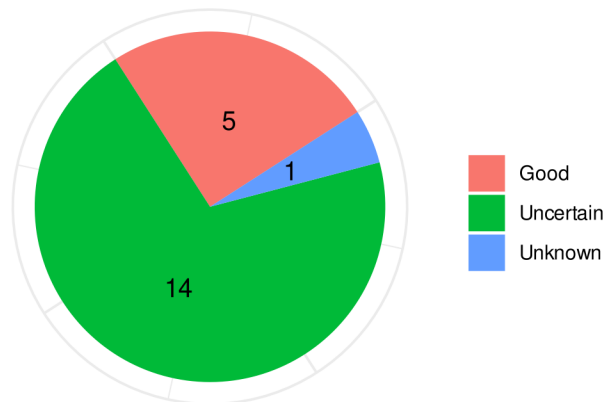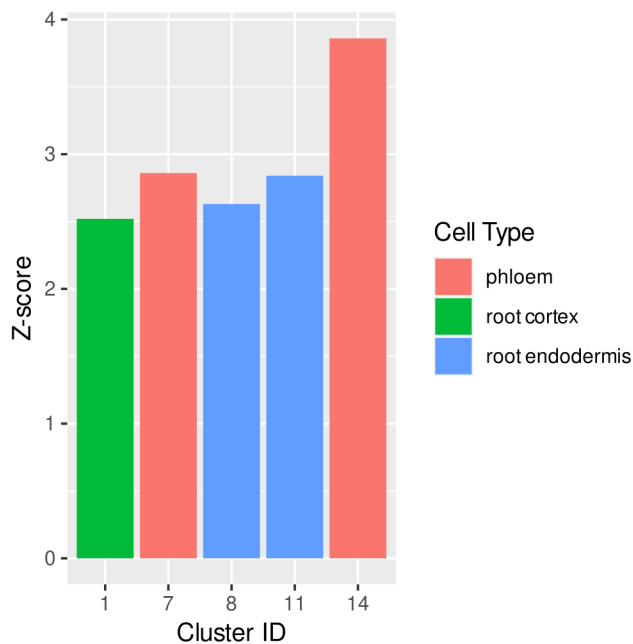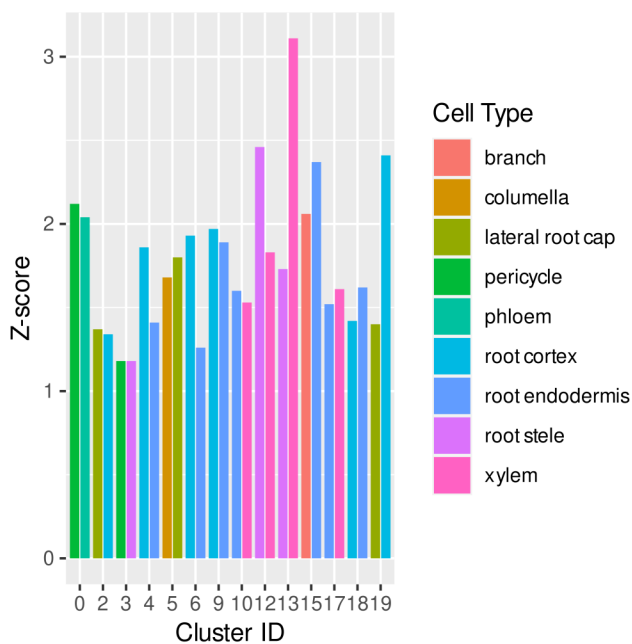

Supplement: gkab949_supplemental_file.pdf [file gkab949_supplemental_file.pdf]
